# Supplementary material for: Effects of D-allulose on glucose tolerance and insulin response to a standard oral sucrose load: results of a prospective, randomized, crossover study
Source: PubMed Central journal article supplement — BMJ Open Diabetes Res Care. 2021 Feb 26;9(1):e001939. doi: 10.1136/bmjdrc-2020-001939 (PMC7919569; doi:10.1136/bmjdrc-2020-001939), 2021-02-26

**Supplemental Figure 1. Comparison of plasma glucose levels among placebo and different D-allulose doses according to race (White vs. African American).** Bars represent mean. P-values represent the treatment by race interaction and the total effect of race on plasma glucose at each time point. AA: African American; W: White.

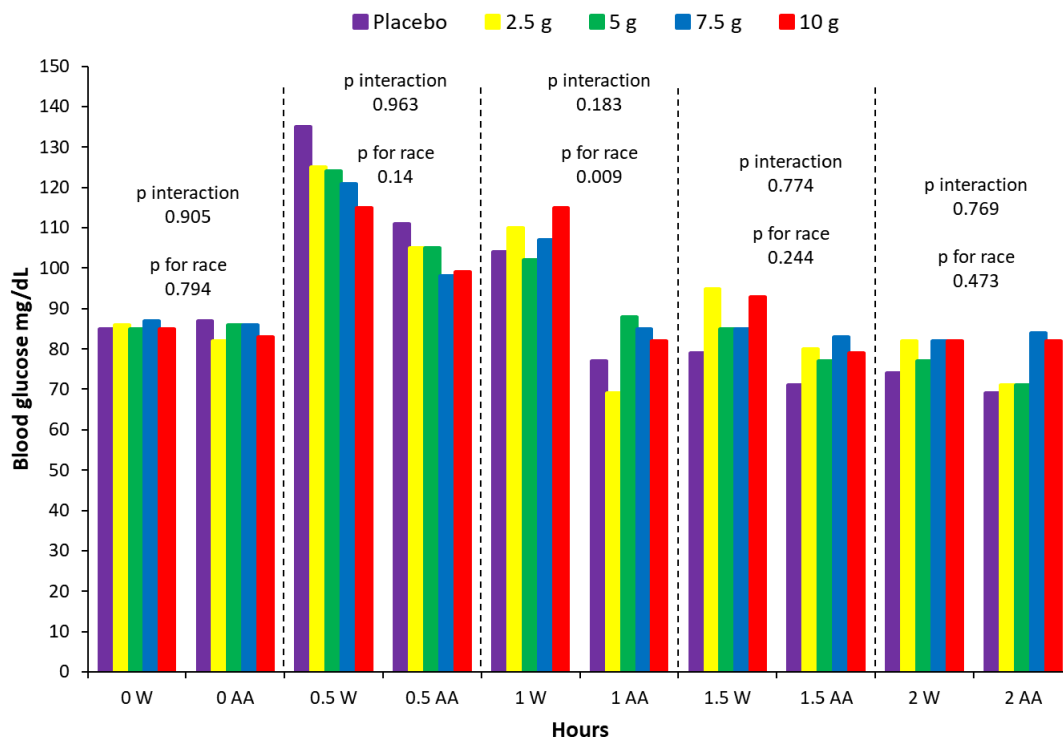

Supplement: bmjdrc-2020-001939supp002.pdf [file bmjdrc-2020-001939supp002.pdf]
